# Supplementary material for: The Protein Chaperone ClpX Targets Native and Non-native Aggregated Substrates for Remodeling, Disassembly, and Degradation with ClpP
Source: PubMed Central journal article supplement (PMC5415555; doi:10.3389/fmolb.2017.00026), 2017-05-04

Figure S4

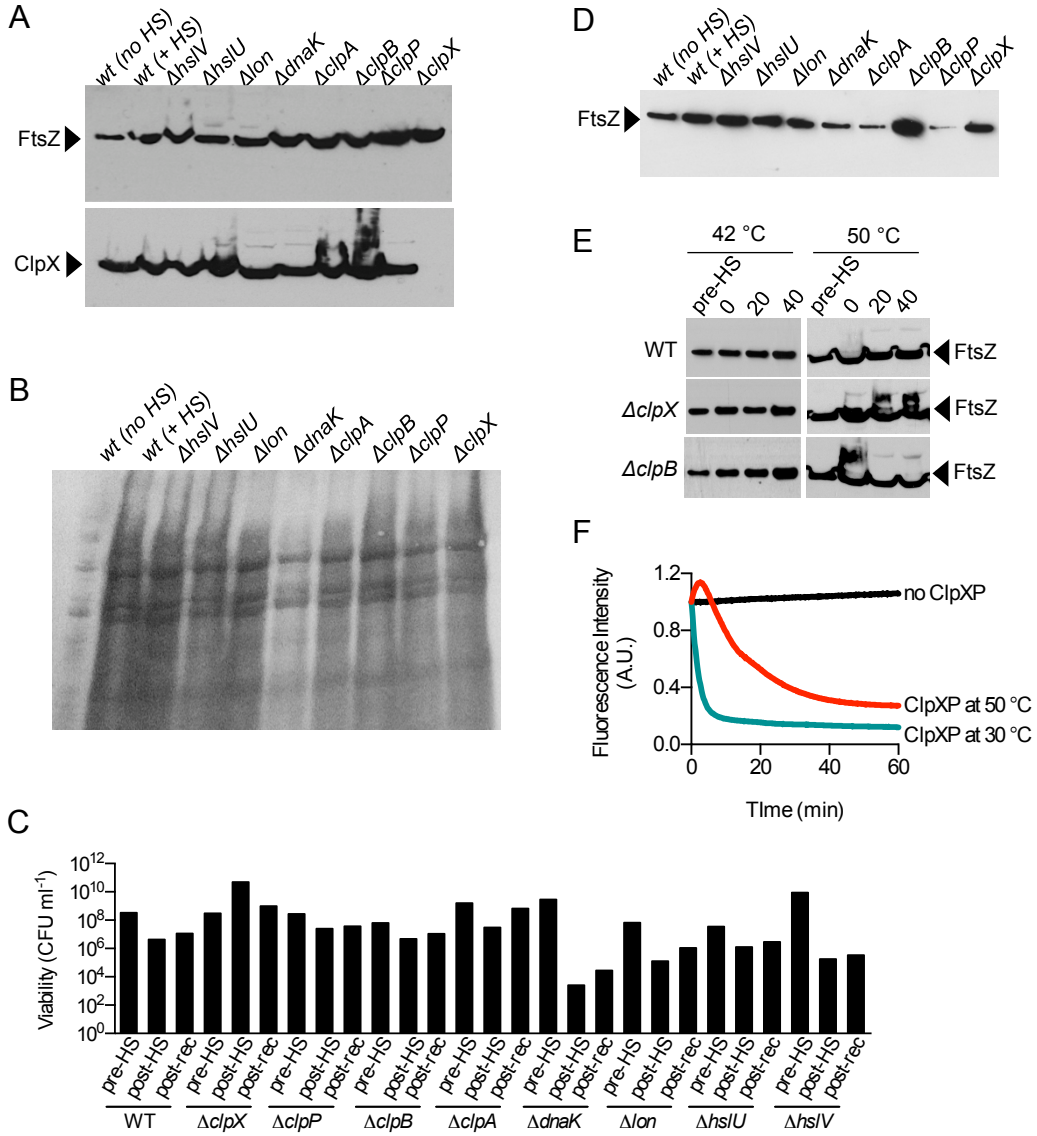

Supplement: Image4.pdf [file Image4.pdf]
